# Supplementary material
Source: publisher figshare collection journal article supplement (https://tandf.figshare.com/articles/dataset/_/22195048)

# Glacial geomorphology of the northwest Laurentide Ice Sheet on the northern Interior Plains and western Canadian Shield, Canada

Helen E. Dulfer<sup>1</sup>, Benjamin J. Stoker<sup>1</sup>, Martin Margold<sup>1</sup> and Chris R. Stokes<sup>2</sup>

<sup>1</sup>Department of Physical Geography and Geoecology, Charles University, Czech Republic

<sup>2</sup>Department of Geography, Durham University, United Kingdom

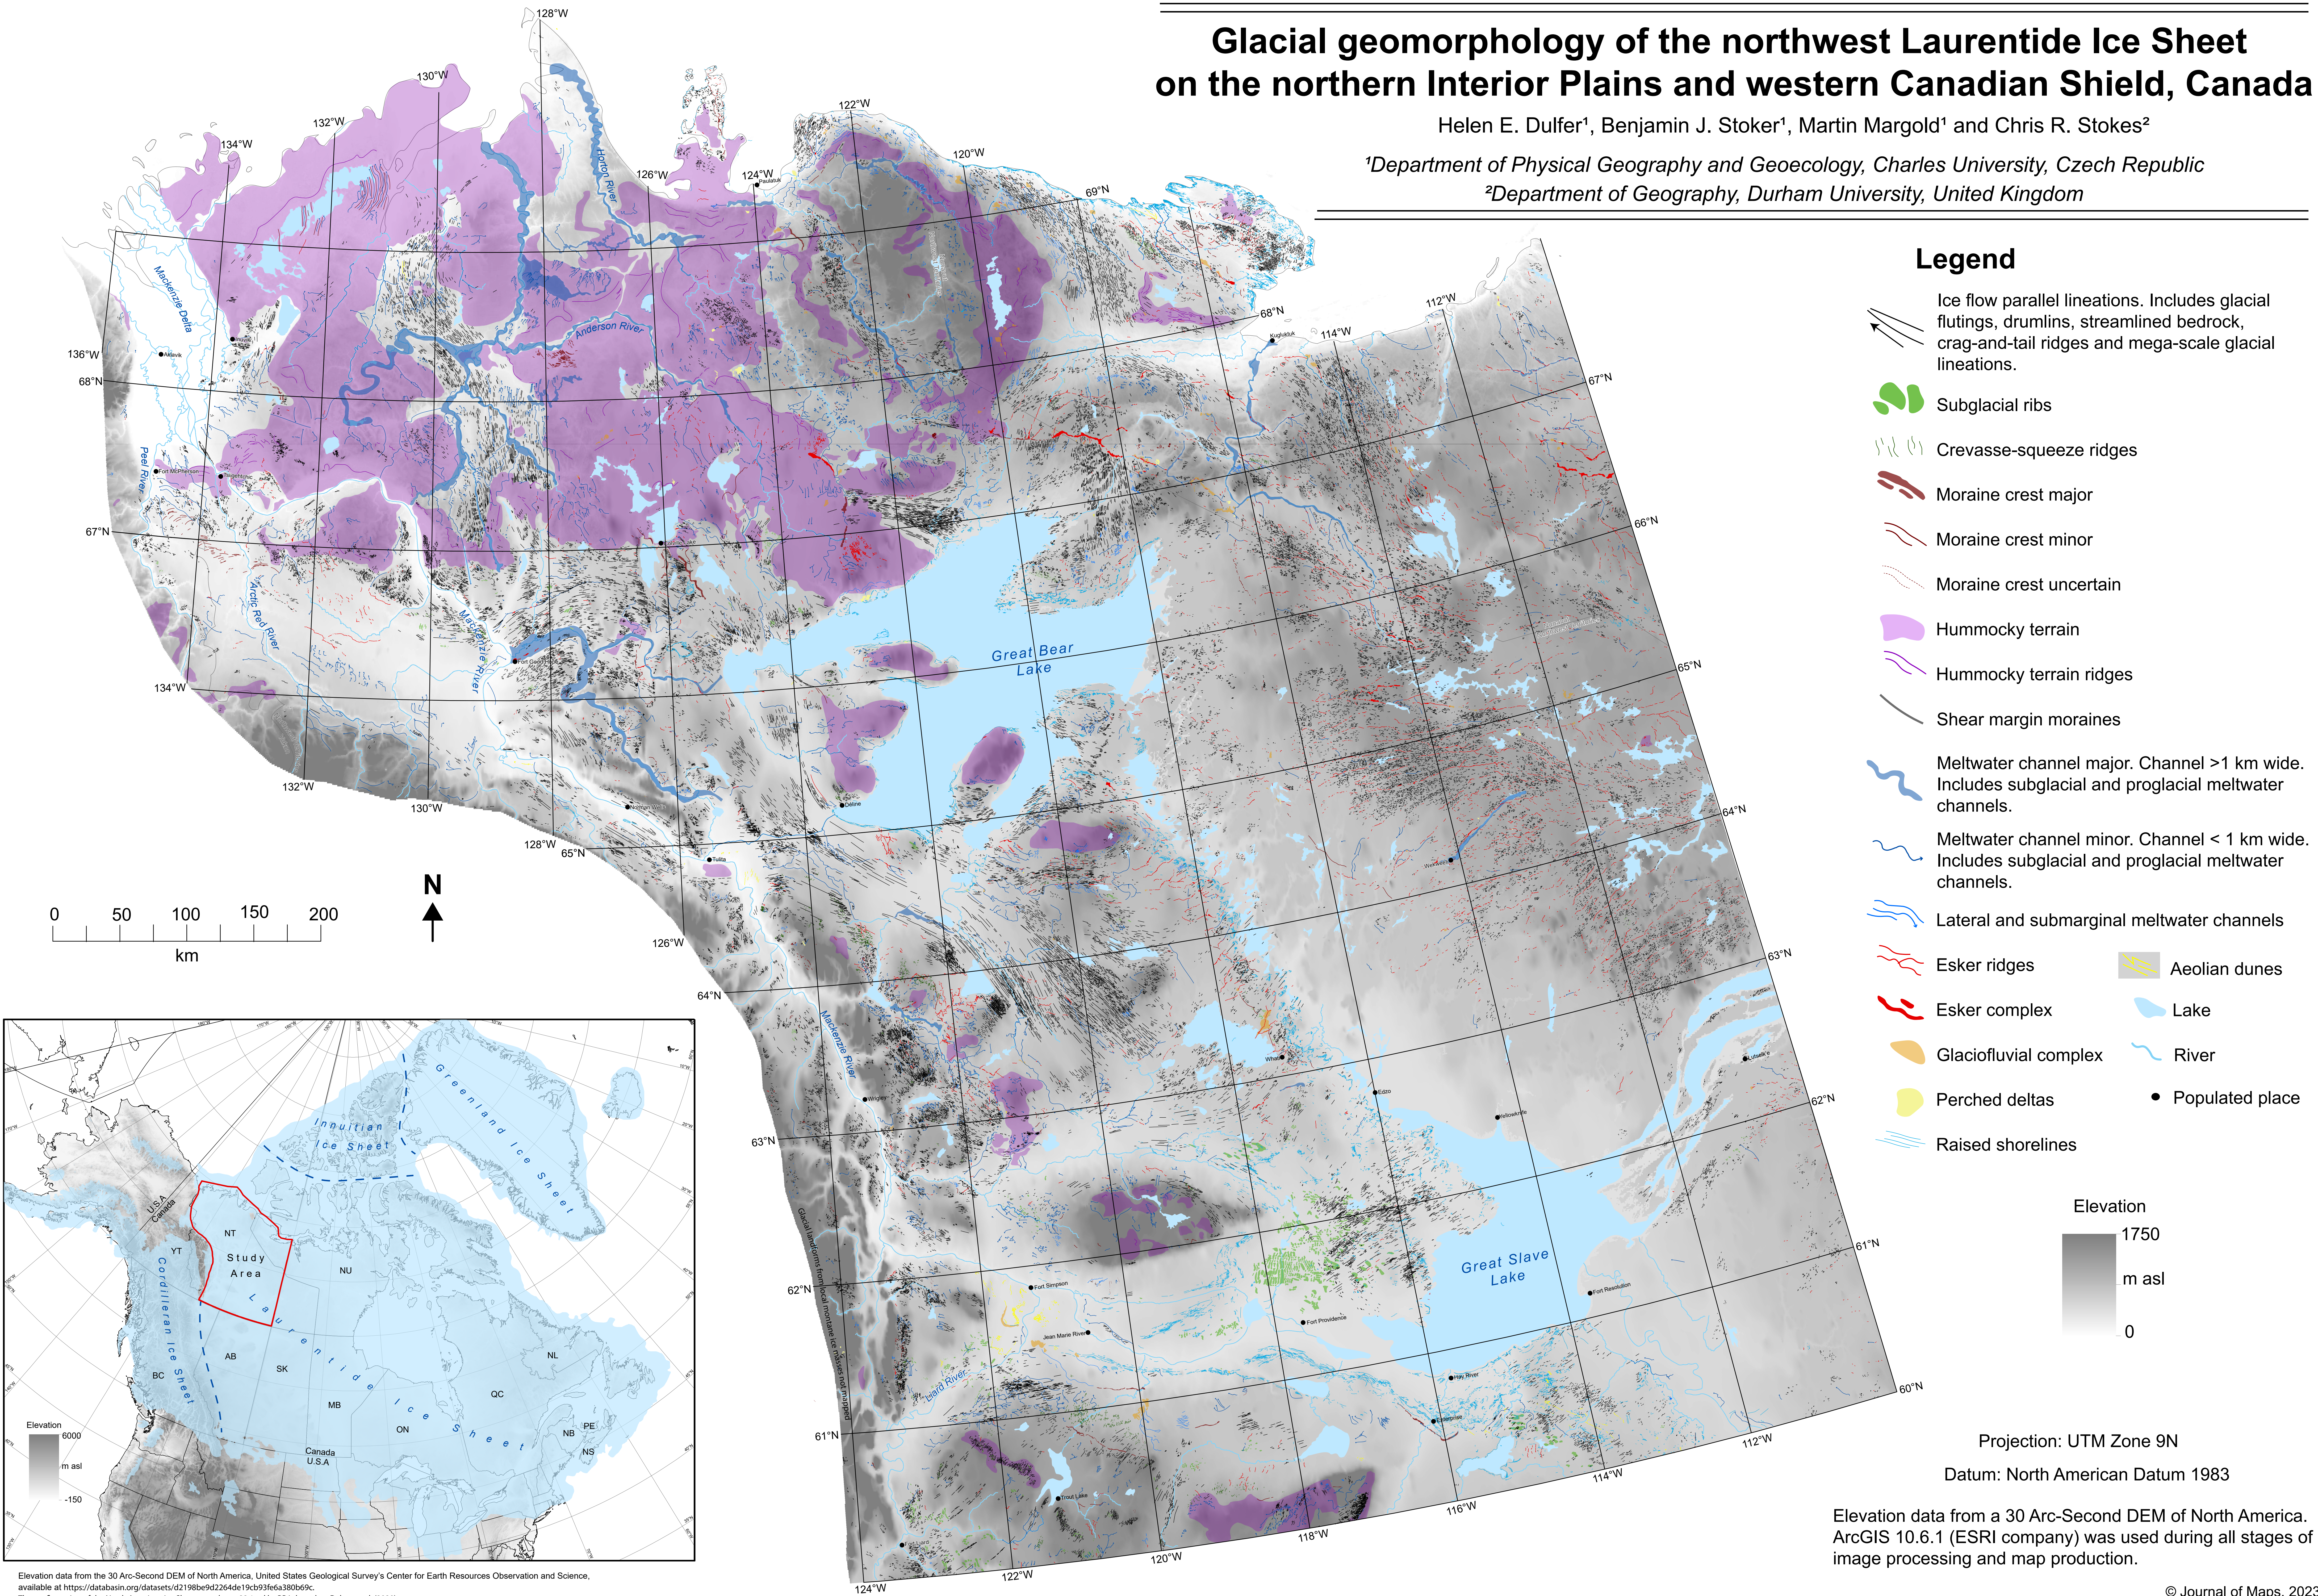

Supplement: Supplementary file 1 [file 1]
